# Supplementary material for: Quantification of cerebrospinal fluid α-synuclein seeds by endpoint dilution seed amplification assay in Parkinson’s disease
Source: Springer Nature journal article supplement (doi:10.1038/s41531-025-01221-7), 2025-12-01
Supplement: MOESM1 [file 41531_2025_1221_MOESM1_ESM.docx]

**Supplementary Table 1.** Overview of genetic variants of α-syn SAA positive PD participants

| **GBA1 variants (n=40)** |
| --- |
| c.1093dupT (n=1) |
| D140H, E326K (n=1) |
| E326K (n=13) |
| E326K, T369M (n=1) |
| E388K (n=1) |
| H255Q (n=1) |
| H255Q, D409H (n=1) |
| L444P (n=7) |
| L444P, E326K, N392S (n=1) |
| L444P, E388K (n=1) |
| N370S (n=4) |
| N370S, S271G (n=1) |
| P245S (n=1) |
| S271G (n=1) |
| T369M (n=4) |
| W179X (n=1) |

Abbreviations: PD, Parkinson’s Disease; SAA, Seed Amplification Assay.**Supplementary Table 2.** Clinical characteristics of participants converting from a negative o a positive LBD status

|  | **#1** | **#2** | **#3** | **#4** | **#5** | **#6** |
| --- | --- | --- | --- | --- | --- | --- |
| **Age at first sampling, years** | 68 | 66 | 44 | 55 | 61 | 66 |
| **Age at baseline, years** | 70 | 72 | 48 | 58 | 62 | 67 |
| **Time from first sampling to baseline, years** | 2.0 | 6.2 | 3.8 | 2.5 | 1.0 | 0.9 |
| **Number of available CSF samples** | 2 | 3 | 2 | 2 | 2 | 2 |
| **Baseline log10SD50/ml value** | 1.0 | 0.93 | 0.62 | 1.13 | 0.93 | 0.87 |
| **Disease duration at baseline, years** | 14.6 | 10.9 | 5.4 | 6.2 | 11 | 3.3 |
| **Sex** | F | M | F | M | M | M |
| **Genetic status** | sPD | sPD | sPD | sPD | sPD | sPD |
| **Time from baseline to H&Y≥3, years** | 4.25 | BB | never | never | BB | never |
| **Time from baseline to MoCA≤18, years** | never | never | never | never | never | never |

Abbreviations: BB, before baseline; CSF, cerebrospinal fluid; F, female; M, male; sPD, sporadic PD.

**Supplementary Table 3.** Demographic and clinical characteristics in the subgroup of early-stage PD: association with SD50 and stratification by SD50 tertile groups

| **Variable** | **N** | **log10SD50/ml** | |
| --- | --- | --- | --- |
| **p value** a | **Rho (95% CI)** |
| **Age at visit, years** | 118 | **0.004** | 0.26  (0.08 – 0.42) |
| **Age at onset, years** | 118 | **0.010** | 0.23  (0.05 – 0.40) |
| **Disease duration, years** | 118 | **0.016** | 0.22  (0.04 – 0.39) |
| **Hoehn&Yahr** | 117 | **0.014** | 0.23  (0.04 – 0.40) |
| **UPDRS part III** | 107 | **0.014** | 0.23  (0.04 – 0.41) |
| **MoCA** | 103 | **0.005** | -0.27  (-0.45 – -0.08) |
| **BDI II** | 76 | 0.739 | 0.04  (-0.19 – 0.27) |
| **LEDD** | 115 | 0.127 | 0.14  (-0.04 – 0.32) |
| **Sniffin Sticks (%)** | 31 | 0.518 | -0.12  (-0.46 – 0.25) |
| **UMSARS Severity of Orthostatic Dysfunction** | 26 | **0.007** | 0.51  (0.14 – 0.76) |
| **UMSARS Severity of Constipation** | 26 | 0.074 | 0.36  (-0.05 – 0.66) |
| **UMSARS Severity of Urge Incontinence** | 26 | 0.431 | 0.16  (-0.25 – 0.52) |

a As derived by Spearman correlation.

Early-stage PD was defined as participants with a disease duration ≤ 5 years at baseline. P values of statistically significant associations are shown in bold.

Abbreviations: BDI II, Beck depression inventory-II; CI, confidence interval; LEDD, Levodopa-equivalent daily dose; MoCA, Montreal cognitive assessment; UMSARS, unified multiple system atrophy rating scale; UPDRS part III, Unified Parkinson's Disease rating scale Part III.

**Supplementary Table 4.** Results of univariable and multivariable linear regression analyses for the association of SD50 values and demographic factors with scales of disease severity

|  | **Univariable analysis** | | **Multivariable analysis** | |
| --- | --- | --- | --- | --- |
|  | **β coefficient (95%CI)** | **p value** | **β coefficient (95%CI)** | **p value** |
| ***H&Y*** | | | | |
| **SD50** | 0.38 (0.14 – 0.62) | **0.002** | 0.15 (-0.07 – 0.37) | 0.175 |
| **Age at sampling** | 0.02 (0.01 – 0.03) | **0.003** | 0.01 (0.006 – 0.02) | **<0.001** |
| **Disease duration** | 0.004 (0.004 – 0.006) | **<0.001** | 0.004 (0.003 – 0.005) | **<0.001** |
| ***UPDRS part III*** | | | | |
| **SD50** | 7.03 (2.22 – 11.85) | **0.004** | 5.03 (0.19 – 9.87) | **0.041** |
| **Age at sampling** | 0.23 (0.07 – 0.39) | **0.005** | 0.15 (-0.18 – 0.31) | 0.081 |
| **Disease duration** | 0.04 (0.02 – 0.06) | **<0.001** | 0.03 (0.009 – 0.05) | **0.006** |
| ***MoCA*** | | | | |
| **SD50** | -3.01 (-4.82 – -1.20) | **0.001** | -1.67 (-3.38 – 0.04) | 0.056 |
| **Age at sampling** | -0.19 (-0.25 – -0.13) | **<0.001** | -0.16 (-0.22 – -0.10) | **<0.001** |
| **Disease duration** | -0.02 (-0.02 – -0.009) | **<0.001** | -0.01 (-0.01 – -0.003) | **0.005** |

P values of statistically significant associations are shown in bold.

Abbreviations: HR, hazard ratio; H&Y, Hoehn and Yahr; UPDRS part III, Unified Parkinson’s Disease rating scale Part III; MoCA, Montreal Cognitive Assessment.

**Supplementary Table 5.** Results of univariable and multivariable logistic regression analyses for the association of SD50 values and demographic factors with disease characteristics at baseline

|  | **Univariable analysis** | | **Multivariable analysis** | |
| --- | --- | --- | --- | --- |
|  | **OR (95%CI)** | **p value** | **OR (95%CI)** | **p value** |
| ***Motor clinical characteristics at baseline*** | | | | |
| ***Motor Wearing-off*** | | | | |
| **SD50** | 5.44 (1.38 – 24.25) | **0.019** | 5.33 (1.02 – 32.47) | 0.057 |
| **Age at sampling** | 1.02 (0.97 – 1.06) | 0.468 | 0.98 (0.92 – 1.03) | 0.435 |
| **Disease duration** | 1.02 (1.01 – 1.03) | **<0.001** | 1.02 (1.01 – 1.02) | **<0.001** |
| ***Diskinesias*** | | | | |
| **SD50** | 2.90 (0.72 – 12.78) | 0.142 | 1.76 (3.31 – 10.21) | 0.514 |
| **Age at sampling** | 1.06 (1.00 – 1.12) | **0.016** | 1.04 (1.00 –1.10) | 0.194 |
| **Disease duration** | 1.01 (1.01 – 1.02) | **<0.001** | 1.01 (1.00 – 1.02) | **<0.001** |
| ***Freezing of gait*** | | | | |
| **SD50** | 2.69 (0.82 – 9.34) | 0.107 | 2.19 (0.55 – 9.06) | 0.267 |
| **Age at sampling** | 1.03 (0.99 – 1.07) | 0.148 | 1.00 (0.96 – 1.05) | 0.842 |
| **Disease duration** | 1.01 (1.01 – 1.02) | **<0.001** | 1.01 (1.00 – 1.02) | **<0.001** |
| ***Repeated falls*** | | | | |
| **SD50** | 2.76 (0.99 – 8.12) | 0.057 | 1.76 (0.55 – 5.84) | 0.345 |
| **Age at sampling** | 1.07 (1.03 – 1.11) | **<0.001** | 1.04 (1.01 – 1.09) | **0.027** |
| **Disease duration** | 1.01 (1.01 – 1.02) | **<0.001** | 1.01 (1.00 – 1.01) | **<0.001** |
| ***Non-motor clinical characteristics at baseline*** | | | | |
| ***RBD*** | | | | |
| **SD50** | 3.43 (1.53 – 8.02) | **0.003** | 2.76 (1.20 – 6.57) | **0.019** |
| **Age at sampling** | 1.03 (1.00 – 1.06) | **0.044** | 1.01 (0.98 – 1.04) | 0.336 |
| **Disease duration** | 1.01 (1.00 – 1.01) | **0.006** | 1.01 (1.00 – 1.01) | **0.029** |
| ***Visual hallucinations*** | | | | |
| **SD50** | 2.85 (1.18 – 7.13) | **0.02** | 1.93 (0.75 – 5.09) | 0.18 |
| **Age at sampling** | 1.07 (1.03 – 1.10) | **<0.001** | 1.05 (1.02 – 1.09) | **0.003** |
| **Disease duration** | 1.01 (1.00 – 1.01) | **<0.001** | 1.01 (1.00 – 1.01) | **0.01** |
| ***Orthostatic hypotension*** | | | | |
| **SD50** | 0.95 (0.46 – 1.98) | 0.894 | 0.80 (0.37 – 1.70) | 0.567 |
| **Age at sampling** | 1.01 (0.99 – 1.04) | 0.364 | 1.01 (0.98 – 1.04) | 0.345 |
| **Disease duration** | 1.00 (0.99 – 1.00) | 0.711 | 1.00 (0.99 – 1.00) | 0.847 |
| ***Constipation*** | | | | |
| **SD50** | 1.42 (0.69 – 2.97) | 0.338 | 1.22 (0.58 – 2.60) | 0.599 |
| **Age at sampling** | 1.03 (1.01 – 1.06) | **0.024** | 1.02 (0.99 – 1.05) | **0.055** |
| **Disease duration** | 1.00 (0.99 – 1.00) | 0.303 | 1.00 (0.99 – 1.00) | 0.544 |
| ***Urge incontinence*** | | | | |
| **SD50** | 1.49 (0.70 – 3.20) | 0.302 | 1.09 (0.49 – 2.42) | 0.829 |
| **Age at sampling** | 1.03 (1.01 – 1.06) | **0.007** | 1.03 (1.00 – 1.06) | **0.028** |
| **Disease duration** | 1.00 (1.00 – 1.01) | **0.048** | 1.00 (0.99 – 1.01) | 0.150 |

P values of statistically significant associations are shown in bold.

Abbreviations: HR, hazard ratio; H&Y, Hoehn and Yahr; MoCA, Montreal Cognitive Assessment.

**Supplementary Table 6.** Results of univariable and multivariable Cox regression analyses for the evaluation of the risk of developing disease milestones

|  | **Univariable analysis** | | **Multivariable analysis** | |
| --- | --- | --- | --- | --- |
|  | **HR (95%CI)** | **p value** | **HR (95%CI)** | **p value** |
| ***Motor milestones*** | | | | |
| ***H&Y≥3*** | | | | |
| **SD50** | 5.09 (1.73 – 14.95) | **0.003** | 3.07 (0.85 – 11.11) | 0.088 |
| **Age at sampling** | 1.12 (1.07 – 1.16) | **<0.001** | 1.14 (1.08 – 1.97) | **<0.001** |
| **Disease duration** | 1.01 (1.005 – 1.01) | **<0.001** | 1.01 (1.01 – 1.02) | **<0.001** |
| ***Motor Wearing-off*** | | | | |
| **SD50** | 2.62 (1.08 – 6.33) | **0.032** | 2.94 (1.16 – 7.47) | **0.023** |
| **Age at sampling** | 0.98 (0.96 – 1.01) | 0.252 | 0.98 (0.95 – 1.01) | 0.092 |
| **Disease duration** | 1.003 (0.99 – 1.01) | 0.193 | 1.00 (0.99 – 1.01) | 0.452 |
| ***Repeated falls*** |  |  |  |  |
| **SD50** | 2.90 (1.04 – 8.09) | **0.043** | 1.93 (0.62 – 5.95) | 0.253 |
| **Age at sampling** | 1.07 (1.03 – 1.12) | **<0.001** | 1.07 (1.03 – 1.12) | **<0.001** |
| **Disease duration** | 1.01 (1.01 – 1.01) | **0.007** | 1.01 (1.01 – 1.01) | **0.028** |
| ***Non-motor milestones*** | | | | |
| ***Visual hallucinations*** | | | | |
| **SD50** | 1.90 (0.63 – 5.71) | 0.252 | 1.46 (0.45 – 4.74) | 0.529 |
| **Age at sampling** | 1.04 (1.00 – 1.07) | **0.049** | 1.03 (0.99 – 1.07) | 0.078 |
| **Disease duration** | 1.01 (0.99 – 1.01) | 0.113 | 1.00 (0.99 – 1.01) | 0.185 |
| ***MoCA≤18*** | | | | |
| **SD50** | 14.31 (2.87 – 71.21) | **0.001** | 9.21 (1.54 – 55.22) | **0.015** |
| **Age at sampling** | 1.10 (1.03 – 1.18) | **0.003** | 1.08 (1.01 – 1.15) | **0.023** |
| **Disease duration** | 1.01 (1.00 – 1.02) | **0.048** | 1.01 (0.99 – 1.01) | 0.110 |
| ***MoCA≤25*** |  |  |  |  |
| **SD50** | 4.00 (1.38 – 11.64) | **0.011** | 3.07 (0.93 – 10.08) | 0.064 |
| **Age at sampling** | 1.07 (1.03 – 1.11) | **0.001** | 1.05 (1.01 – 1.10) | **0.025** |
| **Disease duration** | 1.01 (1.004 – 1.01) | **0.001** | 1.01 (1.01 – 1.01) | **0.018** |

P values of statistically significant associations are shown in bold.

Abbreviations: HR, hazard ratio; H&Y, Hoehn and Yahr; MoCA, Montreal Cognitive Assessment.

**Supplementary Table 7.** Demographic and clinical characteristics: association with LFP scores and stratification by LFP tertile groups

| **Variable** | **N** | **LFP score** | | **LFP score** | | |
| --- | --- | --- | --- | --- | --- | --- |
| **p value** a | **Rho (95% CI)** | **Lowest tertile** b | **Highest tertile** b | **p value** c |
| **Age at visit, years** | 260 | **0.002** | 0.20  (0.07 – 0.31) | 63.8  (53.5 – 70.3) | 69.3  (61.1 – 74.8) | **0.004** |
| **Age at onset, years** | 260 | **0.022** | 0.14  (0.02 – 0.26) | 58.0  (50.0 – 65.0) | 60.5  (53.0 – 68.8) | 0.052 |
| **Disease duration, years** | 260 | **0.003** | 0.18  (0.06 – 0.30) | 4.8  (2.2 – 8.4) | 6.8  (3.9 – 11.1) | **0.004** |
| **Hoehn&Yahr** | 257 | **0.003** | 0.19  (0.06 – 0.30) | 2.0  (2.0 – 2.0) | 2.0  (2.0 – 2.5) | **0.008** |
| **UPDRS part III** | 229 | **0.007** | 0.18  (0.04 – 0.30) | 23.0  (17.0 – 30.3) | 29.0  (18.0 – 39.0) | **0.042** |
| **MoCA** | 228 | **0.004** | -0.19  (-0.32 – -0.06) | 27.0  (23.0 – 29.0) | 24.0  (21.0 – 28.0) | **0.029** |
| **BDI II** | 166 | 0.377 | 0.07  (-0.09 – 0.22) | 8.0  (5.0 – 17.0) | 10.0  (5.0 – 13.0) | 0.970 |
| **LEDD** | 252 | **0.015** | 0.16  (0.03 – 0.28) | 500  (257 – 823) | 627  (348 – 905) | **0.044** |
| **Sniffin Sticks (%)** | 69 | 0.160 | -0.17  (-0.40 – 0.08) | 41.7  (27.1 – 56.3) | 33.3  (25.0 – 50.0) | 0.396 |
| **UMSARS Severity of Orthostatic Dysfunction** | 75 | **0.050** | 0.23  (-0.01 – 0.44) | 0.0  (0.0 – 0.0) | 0.0  (0.0 – 1.0) | 0.057 |
| **UMSARS Severity of Constipation** | 75 | 0.085 | 0.20  (-0.03 – 0.41) | 0.0  (0.0 – 1.0) | 1.0  (0.0 – 2.0) | 0.213 |
| **UMSARS Severity of Urge Incontinence** | 74 | 0.471 | 0.09  (-0.15 – 0.31) | 1.0  (0.0 – 1.0) | 1.0  (0.0 – 1.0) | 0.672 |

a As derived by Spearman correlation.

b Data are expressed as median (interquartile range).

c As derived by Mann-Whitney test.

P values of statistically significant associations are shown in bold. LFP tertiles are defined as follow: lowest = 4 – 10; intermediate = 11 – 17; highest = 18 – 39.

Abbreviations: BDI II, Beck depression inventory-II; CI, confidence interval; LEDD, Levodopa-equivalent daily dose; LFP, Lewy-Fold-Pathology; MoCA, Montreal cognitive assessment; UMSARS, unified multiple system atrophy rating scale; UPDRS part III, Unified Parkinson's Disease rating scale Part III.

**Supplementary Table 8.** Associations between LFP score and binary demographic and clinical characteristics

| **Variable** | **Absence** | | **Presence** | | **p value** b |
| --- | --- | --- | --- | --- | --- |
| **n/n with available data** | **LFP score** a | **n/n with available data** | **LFP score** a |
| **Sex, male** | 79/260 | 14.0  (7.0 – 19.0) | 181/260 | 14.0  (9.5 – 21.0) | 0.096 |
| ***Non-motor clinical characteristics at sampling*** | | | | | |
| **RBD** | 114/225 | 12.0  (8.0 – 16.0) | 111/225 | 16.0  (10.0 – 22.0) | **0.001** |
| **Hyposmia** | 4/74 | 8.5  (4.3 – 15.0) | 70/74 | 15.0  (11.0 – 23.0) | 0.073 |
| **Visual hallucinations** | 184/244 | 14.0  (9.0 – 19.0) | 60/244 | 16.0  (10.0 – 22.0) | **0.033** |
| **Orthostatic hypotension** | 132/244 | 14.0  (9.3 – 19.0) | 112/244 | 15.0  (8.3 – 21.0) | 0.585 |
| **Constipation** | 123/251 | 14.0  (9.0 – 19.0) | 128/251 | 15.0  (9.0 – 21.0) | 0.329 |
| **Urge incontinence** | 91/248 | 14.0  (9.0 – 18.0) | 157/248 | 14.0  (9.0 – 21.0) | 0.290 |
| **Malignant phenotype** c | 55/68 | 15.0  (11.0 – 22.0) | 13/68 | 15.0  (11.5 – 24.5) | 0.474 |
| ***Motor clinical characteristics at sampling*** | | | | | |
| **Motor Wearing-off** | 174/199 | 13.0  (8.0 – 19.0) | 25/199 | 20.0  (12.0 – 23.5) | **0.005** |
| **Dyskinesias** | 155/178 | 13.0  (8.0 – 19.0) | 23/178 | 17.0  (10.0 – 22.0) | 0.093 |
| **Freezing of gait** | 166/197 | 13.0  (9.0 – 19.0) | 31/197 | 16.0  (11.0 – 22.0) | 0.051 |
| **Repeated falls** | 167/214 | 13.0  (9.0 – 19.0) | 47/214 | 16.0  (11.0 – 21.0) | **0.041** |

a Data are expressed as median (interquartile range).

b As derived by Mann-Whitney test.

c Combination of RBD, hyposmia, hallucination, and cognitive impairment.

P values of statistically significant associations are shown in bold.

Abbreviations: RBD, REM sleep behaviour disorder; LFP, Lewy-Fold-Pathology.

**Supplementary Table 9. Demographic and clinical characteristics: association with TTT and stratification by TTT tertile groups**

| **Variable** | **N** | **TTT (h)** | | **TTT (h)** | | |
| --- | --- | --- | --- | --- | --- | --- |
| **p value** a | **Rho (95% CI)** | **Lowest tertile** b | **Highest tertile** b | **p value** c |
| **Age at visit, years** | 250 | 0.165 | 0.09  (-0.04 – 0.21) | 65.9  (57.0 – 71.3) | 68.1  (55.4 – 76.4) | 0.320 |
| **Age at onset, years** | 250 | 0.589 | 0.03  (-0.09 – 0.16) | 60.0  (51.0 – 65.3) | 59.0  (50.0 – 67.0) | 0.918 |
| **Disease duration, years** | 250 | 0.510 | 0.04  (-0.09 – 0.17) | 5.4  (3.2 – 8.4) | 6.1  (2.8 – 10.3) | 0.364 |
| **Hoehn&Yahr** | 247 | 0.223 | 0.08  (-0.05 – 0.20) | 2.0  (2.0 – 2.0) | 2.0  (2.0 – 2.5) | 0.105 |
| **UPDRS part III** | 223 | 0.661 | -0.03  (-0.16 – 0.11) | 27.0  (18.0 – 38.0) | 25.0  (19.0 – 33.0) | 0.858 |
| **MoCA** | 221 | 0.769 | -0.02  (-0.16 – 0.12) | 26.0  (22.0 – 28.0) | 25.5  (22.8 – 28.0) | 0.847 |
| **BDI II** | 161 | 0.051 | -0.15  (-0.31 – 0.004) | 10.0  (5.0 – 13.8) | 6.0  (3.0 – 11.8) | 0.084 |
| **LEDD** | 243 | 0.640 | 0.03  (-0.10 – 0.16) | 547  (291 – 871) | 560  (340 – 820) | 0.819 |
| **Sniffin Sticks (%)** | 68 | 0.983 | -0.003  (-0.25 – 0.24) | 33.3  (29.2 – 66.7) | 41.7  (25.0 – 58.3) | 0.933 |
| **UMSARS Severity of Orthostatic Dysfunction** | 74 | 0.514 | 0.08  (-0.16 – 0.31) | 0.0  (0.0 – 1.0) | 0.0  (0.0 – 1.0) | 0.663 |
| **UMSARS Severity of Constipation** | 74 | 0.509 | 0.08  (-0.16 – 0.31) | 0.0  (0.0 – 1.0) | 0.0  (0.0 – 1.0) | 0.296 |
| **UMSARS Severity of Urge Incontinence** | 73 | 0.692 | 0.05  (-0.19 – 0.28) | 1.0  (0.0 – 1.0) | 1.0  (0.0 – 1.0) | 0.973 |

a As derived by Spearman correlation.

b Data are expressed as median (interquartile range).

c As derived by Mann-Whitney test.

P values of statistically significant associations are shown in bold. TTT tertiles are defined as follow: lowest = 12.06 – 17.50 h; intermediate = 17.51 – 20.59 h; highest = 20.60 – 28.30 h.

Abbreviations: BDI II, Beck depression inventory-II; CI, confidence interval; LEDD, Levodopa-equivalent daily dose; MoCA, Montreal cognitive assessment; TTT, time to threshold; UMSARS, unified multiple system atrophy rating scale; UPDRS part III, Unified Parkinson's Disease rating scale Part III.

**Supplementary Table 10.** Associations between TTT and binary demographic and clinical characteristics

| **Variable** | **Absence** | | **Presence** | | **p value** b |
| --- | --- | --- | --- | --- | --- |
| **n/n with available data** | **TTT** a | **n/n with available data** | **TTT** a |
| ***Non-motor clinical characteristics at sampling*** | | | | | |
| **RBD** | 114/225 | 20.6  (18.3 – 22.6) | 111/225 | 20.5  (18.40 – 22.7) | 0.475 |
| **Hyposmia** | 4/74 | 21.1  (20.8 – 26.5) | 70/74 | 21.0  (18.7 – 23.1) | 0.367 |
| **Visual hallucinations** | 184/244 | 20.7  (18.5 – 22.7) | 60/244 | 20.3  (17.8 – 22.5) | 0.430 |
| **Orthostatic hypotension** | 132/244 | 20.4  (18.0 – 22.6) | 112/244 | 20.7  (18.7 – 22.7) | 0.185 |
| **Constipation** | 123/251 | 20.8  (17.9 – 22.7) | 128/251 | 20.5  (18.7 – 22.5) | 0.570 |
| **Urge incontinence** | 91/248 | 20.7  (18.2 – 22.7) | 157/248 | 20.5  (18.3 – 22.5) | 0.815 |
| **Malignant phenotype** c | 55/68 | 21.0  (18.7 – 23.3) | 13/68 | 21.0  (19.3 – 22.2) | 0.928 |
| ***Motor clinical characteristics at sampling*** | | | | | |
| **Motor Wearing-off** | 174/199 | 20.7  (18.4 – 22.5) | 25/199 | 20.6  (18.9 – 24.2) | 0.652 |
| **Dyskinesias** | 155/178 | 20.6  (18.5 – 22.6) | 23/178 | 21.4  (19.4 – 24.5) | 0.246 |
| **Freezing of gait** | 166/197 | 20.5  (18.3 – 22.6) | 31/197 | 21.1  (18.4 – 23.5) | 0.592 |
| **Repeated falls** | 167/214 | 20.5  (18.3 – 22.5) | 47/214 | 19.9  (17.3 – 24.5) | 0.948 |

a Data are expressed as median (interquartile range).

b As derived by Mann-Whitney test.

c Combination of RBD, hyposmia, hallucination, and cognitive impairment.

P values of statistically significant associations are shown in bold.

Abbreviations: RBD, REM sleep behaviour disorder; LFP, Lewy-Fold-Pathology.

**Supplementary Table 11.** Baseline demographic and clinical characteristics in the “high and fast” and “low and slow” groups

|  | **High and fast (n=42)** | **Low and slow (n=41)** | **p value** |
| --- | --- | --- | --- |
| **Sex, male, n (%)** | 31/42 (73.8) | 28/41 (68.3) | 0.579 |
| **Age at visit, years** a | 68.2 (60.3 – 73.7) | 63.8 (52.9 – 80.1) | 0.221 |
| **Age at onset, years** a | 61.5 (52.5 – 69.0) | 55.0 (49.0 – 66.0) | 0.206 |
| **Disease duration at first sampling, years** a | 5.5 (3.2 – 8.9) | 5.5 (1.9 – 9.4) | 0.373 |
| **Time from first visit to last visit, months a** | 45.5 (20.8 – 94.3) | 48.0 (12.5 – 101.0) | 0.933 |
| **Time from baseline to last visit, months a** | 22.0 (5.3 – 47.3) | 24.0 (12.0 – 52.5) | 0.451 |
| **Hoehn&Yahr** a | 2.0 (2.0 – 2.1) | 2.0 (2.0 – 2.3) | 0.878 |
| **UPDRS part III** a | 30.0 (19.0 – 39.3) | 24.0 (19.0 – 29.0) | **0.048** |
| **MoCA** a | 24.5 (20.0 – 28.0) | 26.0 (23.0 – 29.0) | 0.086 |
| **BDI II** a | 10.5 (5.3 – 13.0) | 6.5 (4.3 – 17.0) | 0.385 |
| **LEDD** a | 600 (260 – 895) | 515 (270 – 777) | 0.291 |
| **Sniffin Sticks (%)** a | 33.3 (18.8 – 64.6) | 50.0 (25.0 – 58.3) | 0.609 |
| **Presence of RBD** b | 23/34 (67.6) | 15/37 (40.5) | **0.022** |
| **Presence of Hyposmia** b | 13/13 (100) | 12/13 (92.3) | 0.308 |
| **Presence of Hallucinations** b | 15/38 (39.5) | 10/32 (31.3) | 0.474 |
| **Presence of Orthostatic Hypotension** b | 21/40 (52.5) | 18/38 (47.4) | 0.651 |
| **Presence of Constipation** b | 21/40 (52.5) | 16/39 (41.0) | 0.307 |
| **Presence of Urge** b | 28/39 (71.8) | 19/39 (48.7) | **0.037** |
| **Presence of Malignant Phenotype** b,c | 4/11 (36.4) | 2/11 (18.2) | 0.635 |
| **Presence of Motor Wearing-off** b | 5/28 (17.9) | 2/33 (6.0) | 0.231 |
| **Presence of Dyskinesias** b | 4/24 (16.7) | 3/32 (9.4) | 0.447 |
| **Presence of Freezing of gait** b | 5/28 (17.9) | 4/36 (11.1) | 0.488 |
| **Presence of Repeated Falls** b | 7/34 (20.6) | 7/36 (19.4) | 0.905 |
| **log10SD50/ml** a | 1.48 (1.40 – 1.62) | 0.80 (0.70 – 0.89) | **<0.0001** |

a Data are expressed as median (interquartile range).

b Data are expressed as number/number of participants with available data (%).

c Combination of RBD, hyposmia, hallucination, and cognitive impairment.

Baseline was defined as the timepoint of the first available SAA-positive CSF sample.

Abbreviations: BDI II, Beck depression inventory-II; LEDD, Levodopa-equivalent daily dose; MoCA, Montreal cognitive assessment; PD, Parkinson’s Disease; RBD, REM sleep behaviour disorder; UPDRS part III, Unified Parkinson's Disease rating scale Part III.

**
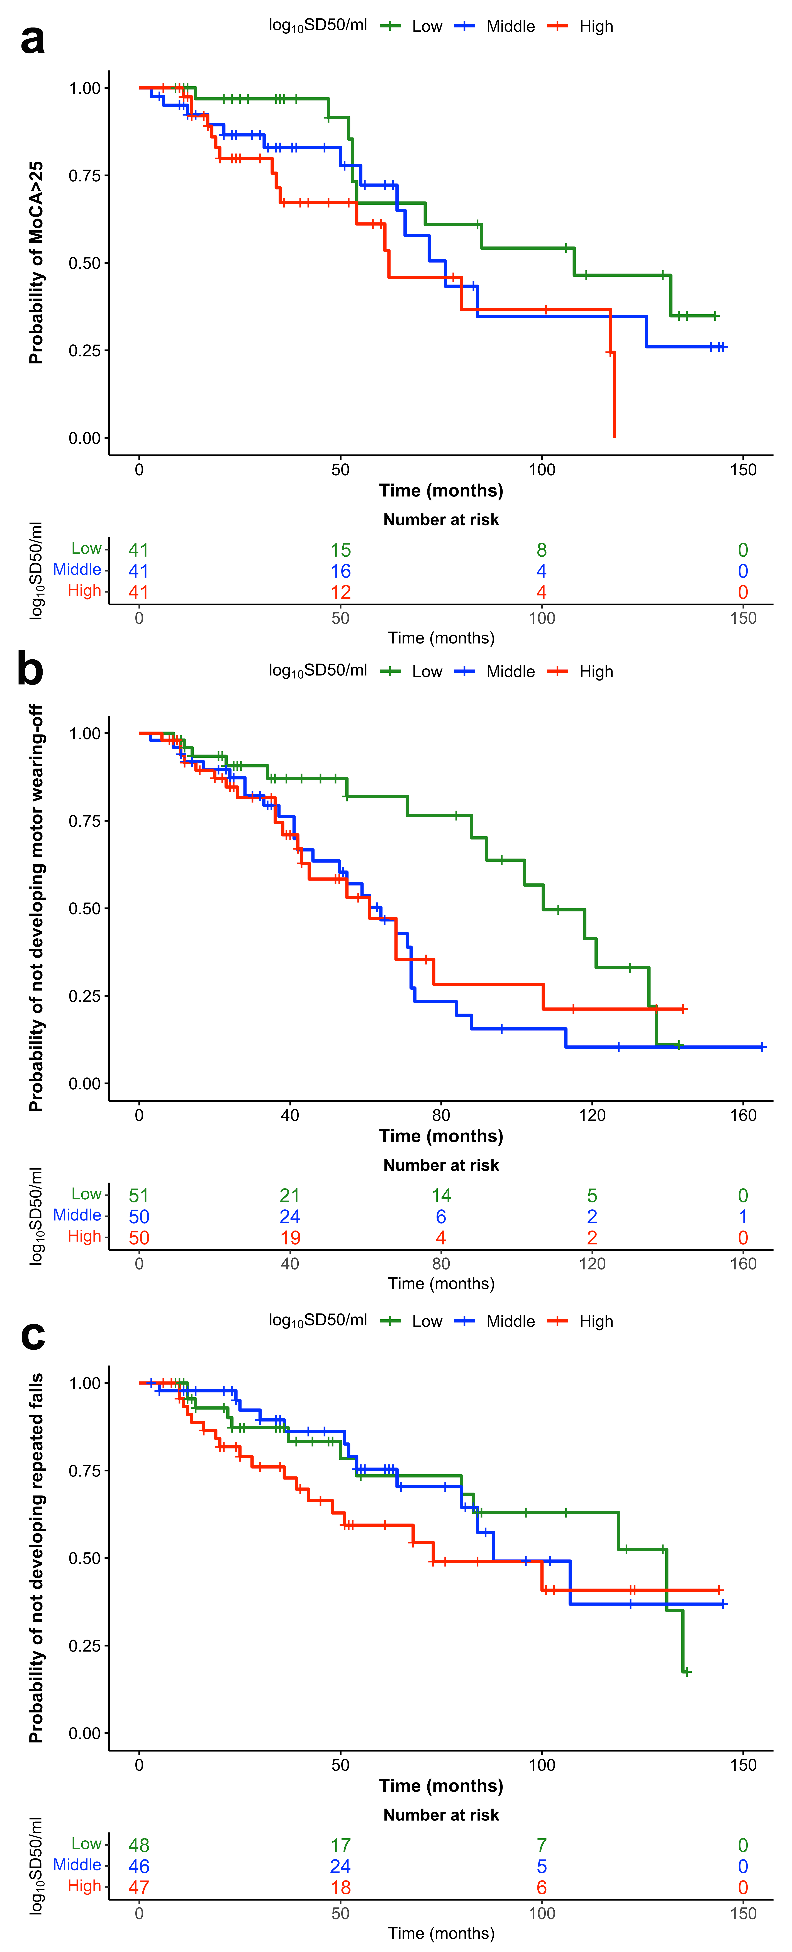
**

**Supplementary Figure 1: Predictive value of SD50 in the development of disease milestones.**

Kaplan-Meier curves showing the probability of developing cognitive impairment, as defined by MoCA score ≤ 25 (**a**), motor wearing-off (**b**) and repeated falls (**c**) according to baseline log10SD50/ml tertiles. Time is expressed in months.

Abbreviations: MoCA, Montreal Cognitive Assessment.

**
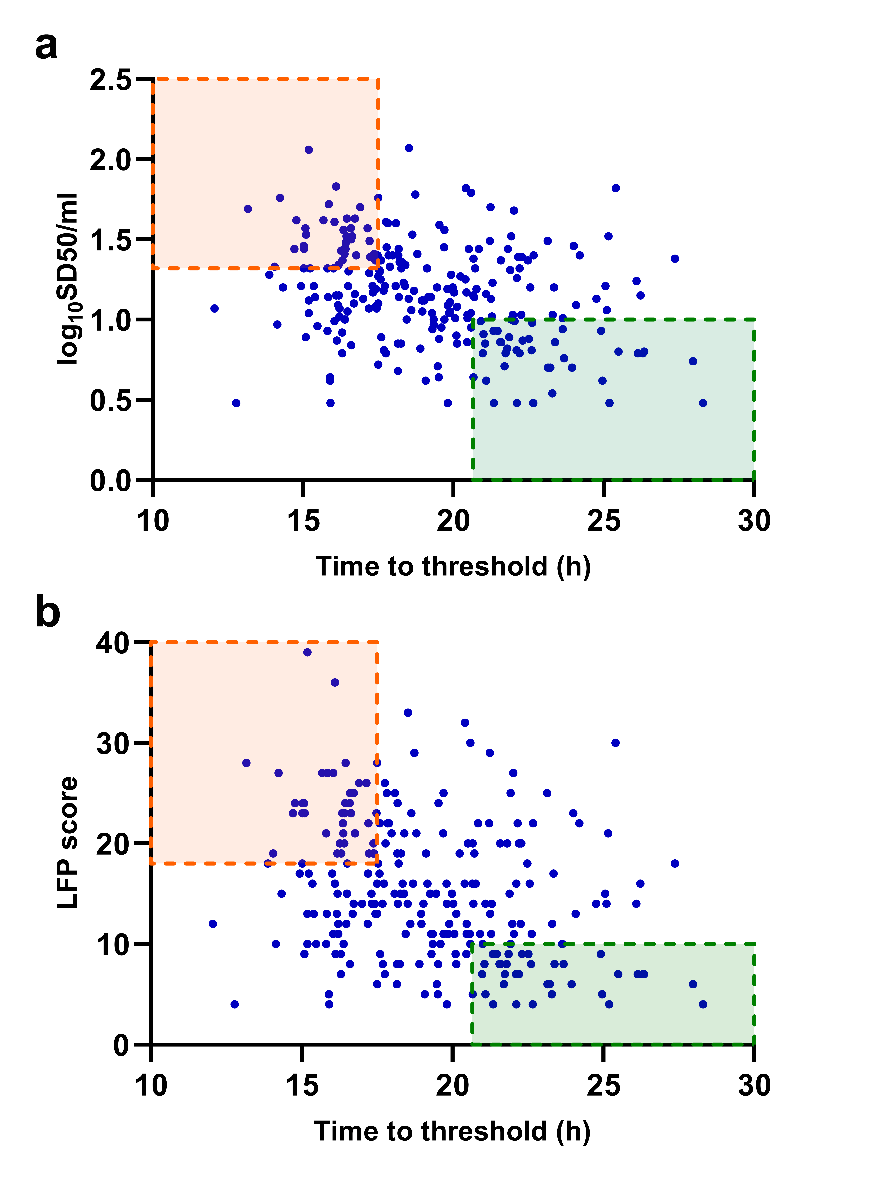
**

**Supplementary Figure 2: Association between time to threshold and dilution parameters (SD50 and LFP Score).**

Blue dots represent single observations. For each sample, the time to threshold corresponds to the median calculated across the positive replicates. Cut-off points for the “high and fast” (orange) group defined by the high tertile of log10SD50 (**a**) and LFP score (**b**) and the fast tertile of time to threshold values. Cut-off points for the “low and slow” (green) group defined by the low tertile of log10SD50 (**a**) and LFP score (**b**) and the slow tertile of time to threshold values.

Abbreviations: LFP, Lewy-Fold-Pathology.

**
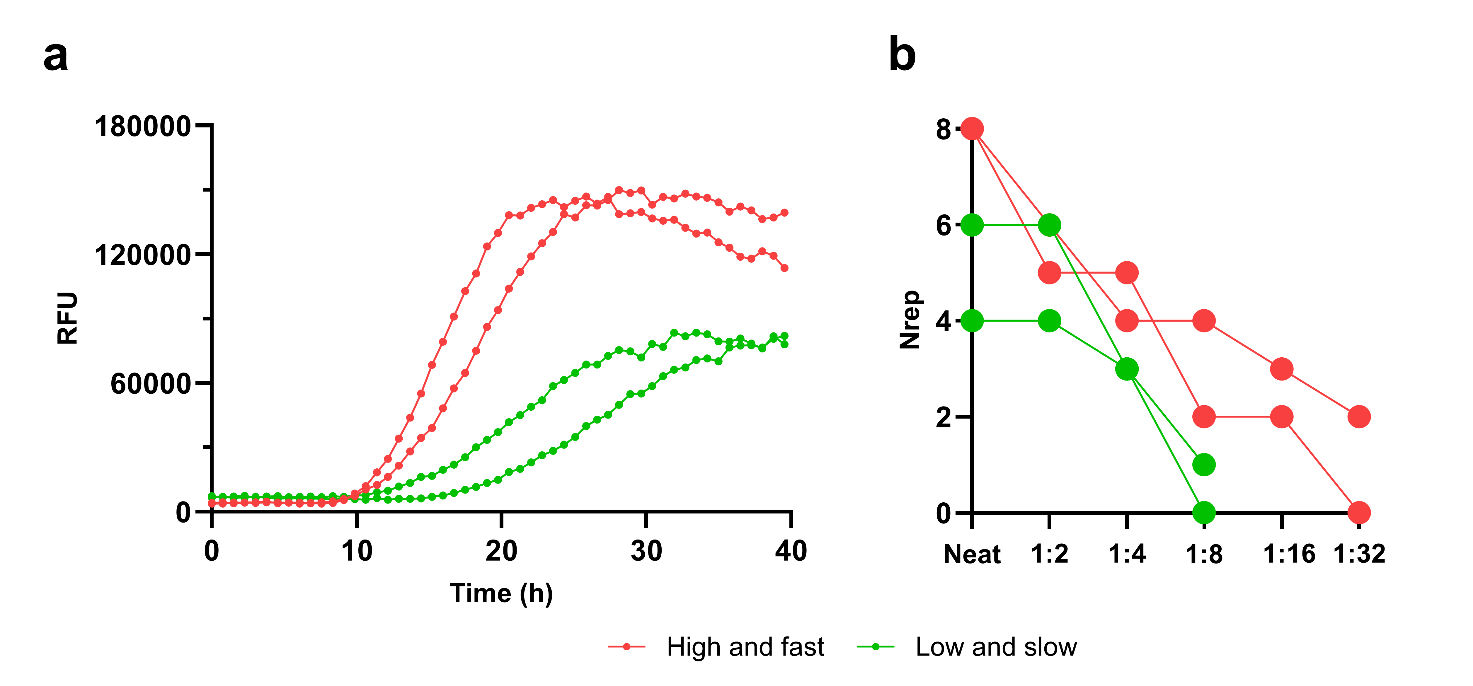
**

**Supplementary Figure 3: CSF seeding activity in “high and fast” and “low and slow” groups.**

**a**) A-syn RT-QuIC kinetic curves at neat concentration in two participant from each group: “high and fast”, depicted in red (log10SD50 = 1.61 and 1.52), and “low and slow”, depicted in green (log10SD50 = 0.99 and 0.79). The median value of fluorescent intensity of positive replicates is shown, and interquartile range values are hidden for graphical reasons. **b**) Number of positive replicates at increasing dilutions in the four above-described participants. CSF samples were diluted by a two-fold factor.

Abbreviations: Nrep, number of positive replicates; RFU, relative fluorescence unit.
